# Supplementary material
Source: Elsevier journal article supplement (https://www.sciencedirect.com/science/article/pii/S2340932018300161)
Supplement: mmc1 [file S2340932018300161:mmc1.docx]

| Tabla suplementaria 1: Ciclos de recepción de ovocitos con y sin luteinización precoz en el ciclo de estimulación de la donante. criterio de luteinización precoz: progesterona sérica el día del bolo de análogo ≥1,2 ng/ml | | | |
| --- | --- | --- | --- |
|  | **P día bolo análogos < 1,2 ng/ml**  **(n=97)** | **P día bolo análogos ≥ 1,2 ng/ml**  **(n=56)** | **Diferencia (IC 95%) // OR (IC 95%)** |
| **Estradiol día bolo análogos (pg/mL)** | 1986±1420  (184;7435) | 2393±1469  (657; 8567) | -0,3  (-0,6;0,04) |
| **Progesterona día bolo análogos (ng/mL)** | 0,8±0,2  (0.4; 1.1) | 1,5±0,2  (1,2; 1,9) | -3,5 *  (-4; -2,9) |
| **Nº folículos** | 9,4±3,8  (1;19) | 11,5±5,6  (2;29) | -2,4 *  (-2,8;-2) |
|  |  |  |  |
| **Nº ciclos de recepción** | 97 | 56 |  |
| **Nº ciclos con transferencia** | 84 | 46 |  |
| **Nº ciclos sin transferencia** | 13 | 10 |  |
|  |  |  |  |
| **Nº ovocitos totales recibidos** | 7,4±2,2  (3; 16) | 7,4±2,4  (3; 15) | 0  (-0,3; 0,3) |
| **Nº ovocitos met II recibidos** | 6,9 ± 2,2  (2; 15) | 7,3±2,4  (3; 15) | -0,5 *  (-0,8; -0,2) |
| **Tasa fecundación** | 71% (475/665) | 67%(273/409) | 1,2  (0,9; 1,6) |
| **Total embriones:** | 428 | 254 |  |
| **A** | 24% (103/428) | 21% (54/254) | 1,1  (0,8; 1,7) |
| **B** | 11% (46/428) | 13% (33/254) | 0,8  (0,5; 1,3) |
| **C** | 28% (122/428) | 26% (66/254) | 1,1  (0,8; 1,6) |
| **D** | 37% (157/428) | 40% (101/254) | 0,8(0,6; 1,2) |
|  |  |  |  |
| **Nº embriones transferidos** | 1,76 ±0,4 (1; 2)  N=148 | 1,74±0,4(1; 2)  N=80 | 0,05  (-0,3; 0,4) |
|  |  |  |  |
| **CONT. TABLA SUPL. 1**  **Tasa implantación** | 31% (46/148) | 37% (30/80) | 0,7  (0,4; 1,3) |
| **Tasa gestación por ciclo** | 40% (39/97) | 43% (24/56) | 0,9  (0,5; 1,7) |
| **Tasa gestación por transferencia** | 46% (39/84) | 52% (24/46) | 0,8  (0,4; 1,6) |
| **Tasa gestación múltiple** | 18% (7/39) | 21% (5/24) | 0,8  (0,2; 2,9) |
| **Tasa de abortos** | 28% (11/39) | 11% (6/56) | 3,2  (1; 9,8) |
| **Tasa nacido vivo por ciclo** | 23% (22/97) | 27% (15/56) | 0,8  (0,4; 1,7) |
| **Tasa nacido vivo por transferencia** | 26% (22/84) | 33% (15/46) | 0,7  (0,3; 1,6) |

*****P<0,05

| Tabla suplementaria 2: Ciclos de recepción de ovocitos con y sin luteinización precoz en el ciclo de estimulación de la donante. criterio de luteinización precoz: progesterona sérica el día del bolo de análogo ≥1,2 ng/ml y progesterona sérica el día 6-7 ≥ 0,9 ng/ml (indice de luteinización precoz prolongada) | | | |
| --- | --- | --- | --- |
|  | **No luteinización precoz prolongada**  **(n=118)** | **Luteinización precoz**  **Prolongada**  **(n=35)** | **Diferencia (IC 95%) // OR (IC 95%)** |
| Estradiol día bolo análogos (pg/mL) | 1066±805  (60; 4343) | 2152±1554  (657;8567) | -1 *  (-1,4;-0,7) |
| Progesterona día bolo análogos (ng/mL) | 0,9±0,3  (0,4; 1,9) | 1,5±0,2  (1,3;1,9) | -2 *  (-2,5;-1,7) |
| Nº folículos | 14,9±3,8  (4;24) | 11,3±6,7  (2; 29) | 0,8 *  (0,4;1,2) |
|  |  |  |  |
| Nº ciclos de recepción | 118 | 35 |  |
| Nº ciclos con transferencia | 99 | 31 |  |
| Nº ciclos sin transferencia | 19 | 4 |  |
|  |  |  |  |
| Nº ovocitos totales recibidos | 7,4±2,1  (3; 16) | 7,3±2,9  (3; 15) | 0,04  (-0,3;0,4) |
| Nº ovocitos met II recibidos | 6,9 ± 2,1  (2; 15) | 7,2±2,8  (3; 15) | -0,1  (-0,5;0,2) |
| Tasa fecundación | 70% (578/821) | 67%(170/253) | 1,2  (0,8;1,6) |
| Total embriones: | 519 | 163 |  |
| A | 21,5% (112/519) | 27% (45/163) | 0,7  (0,5;1,1) |
| B | 11% (56/519) | 14% (23/163) | 0,7  (0,4;1,2) |
| C | 29% (149/519) | 24% (39/163) | 1,3  (0,8;1,9) |
| D | 39% (202/519) | 34% (56/163) | 1,2  (0,8;1,7) |
| Nº embriones transferidos | 1,74 ±0,4 (1-2)  N=99 | 1,77±0,4(1-2)  N=55 | 0  (-0,4;0,4) |
| Tasa implantación | 54,5% (54/99) | 40% (22/55) | 1,8  (0,9;3,5) |
|  |  |  |  |
| CONT. TABLA SUPL.2  Tasa gestación por ciclo | 38% (45/118) | 51% (18/35) | 0,6  (0,3;1,2) |
| Tasa gestación por transferencia | 45% (45/99) | 58% (18/31) | 0,6  (0,3;1,4) |
| Tasa gestación múltiple | 20% (9/45) | 17% (3/18) | 1,2  (0,3;5,3) |
| Tasa de abortos | 24% (11/45) | 33% (6/18) | 0,6  (0,2;2,1) |
| Tasa nacido vivo por ciclo | 29% (34/118) | 34% (12/35) | 0,7  (0,3;1,7) |
| Tasa nacido vivo por transferencia | 34% (34/99) | 39% (12/31) | 0,8  (0,4;1,9) |

*****P<0,05

| Tabla suplementaria 3: Ciclos de recepción de ovocitos con y sin luteinización prevoz en el ciclo de estimulación de la donante. criterio de luteinización precoz: indice progesterona/ nº folículos | | | |
| --- | --- | --- | --- |
|  | **P /folículos** ≤ **0,183**  **(n=128)** | **P/ nº folículos > 0,183**  **(n=25)** | **Diferencia (IC 95%) // OR (IC 95%)** |
| Estradiol día bolo análogos (pg/mL) | 2216±1415  (507;7435) | 1721±1566  (184;8567) | 0,3  (-0,08; 0,8) |
| Progesterona día bolo análogos  (ng/mL) | 1,03 ±0,4  (0,4; 1,9) | 1,3±0,3  (0,8; 1,7) | -0,7 *  (-1,1;-0,3) |
| Nº folículos | 16,2±4,4  (4;34) | 10,2±2,3  (7-14) | 1,5*  (1,1;2) |
|  |  |  |  |
| Nº ciclos de recepción | 128 | 25 |  |
| Nº ciclos con transferencia | 106 | 24 |  |
| Nº ciclos sin transferencia | 22 | 1 |  |
|  |  |  |  |
| Nº ovocitos totales recibidos | 7,4±2,3  (3; 16) | 7,5±2,3  (4; 15) | 0,26  (-0,1; 0,7) |
| Nº ovocitos met II recibidos | 6,9 ± 2,3  (2; 15) | 7,3±2,3  (4; 14) | -0,17  (-0,6; 0,2) |
| Tasa fecundación | 71% (633/893) | 63%(115/181) | 1,4  (0,9; 1,9) |
| Total embriones: | 580 | 102 |  |
| A | 23% (133/580) | 23% (24/102) | 0,9  (0,6; 1,6) |
| B | 11% (64/580) | 15% (15/102) | 0,7  (0,4; 1,3) |
| C | 27% (158/580) | 29% (30/102) | 0,9  (0,6; 1,4) |
| D | 39% (225/580) | 32% (33/102) | 1,3  (0,8; 2) |
|  |  |  |  |
| CONT.TABLA SUPL.3  Nº embriones transferidos | 1,77 ±0,4 (1; 2)  N=188 | 1,67±0,5(1; 2)  N=40 | 0,24  (-0,2; 0,7) |
| Tasa implantación | 34% (64/188) | 30% (12/40) | 1,2  (0,6; 2,5) |
| Tasa gestación por ciclo | 42% (54/128) | 36% (9/25) | 1,3  (0,5; 3,1) |
| Tasa gestación por transferencia | 51% (54/106) | 37% (9/24) | 1,7  (0,7; 4,3) |
| Tasa gestación múltiple | 17% (9/54) | 33% (3/9) | 0,4  (0,08; 1,9) |
| Tasa de abortos | 26% (14/54) | 33% (3/9) | 0,7  (0,1; 3,2) |
| Tasa nacido vivo por ciclo | 24% (31/128) | 24% (6/25) | 1  (0,4; 2,7) |
| Tasa nacido vivo por transferencia | 29% (31/106) | 25% (6/24) | 1,2  (0,5; 3,4) |

*****P<0,05

| Tabla suplementaria 4: Ciclos de recepción de ovocitos con y sin luteinización precoz en el ciclo de estimulación de la donante. criterio de luteinización precoz: índice progesterona/ estradiol | | | |
| --- | --- | --- | --- |
|  | **Índice P/E** ≤**1ng/ml**  **(n=100)** | **Índice P/E >1 ng/ml**  **(n=33)** | **Diferencia (IC 95%) // OR (IC 95%)** |
| Estradiol día bolo análogos(pg/ml) | 2384±1511  (507;8567) | 1231±616  (184;2760) | 0,8*  (0,4; 1,2) |
| Progesterona día bolo análogos (ng/ml) | 1±0.4  (0.4;1,9) | 1,2±0,3  (0,6;1,7) | -0,5 *  (-0,9;-0,1) |
| Nº folículos | 10,9±4,7  (1;29) | 7,5±3,2  (2;16) | 0,8*  (0,4; 1,2) |
|  |  |  |  |
| Nº ciclos de recepción | 120 | 33 |  |
| Nº ciclos con transferencia | 100 | 30 |  |
| Nº ciclos sin transferencia | 20 | 3 |  |
|  |  |  |  |
| Nº ovocitos totales recibidos | 7,6±2,3  (3; 16) | 6,8±2  (3; 16) | 0,3 *  (0,03;0;7) |
| Nº ovocitos met II recibidos | 7,2 ± 2,4  (2; 15) | 6,5±2  (3; 10) | 0,3  (-0,08; 0,7) |
| Tasa fecundación | 69% (595/859) | 71%(153/215) | 0,9  (0,6; 1,3) |
| Total embriones: | 546 | 136 |  |
| A | 23% (128/546) | 21% (29/136) | 1,1  (0,7; 1,8) |
| B | 11% (59/546) | 15% (20/136) | 0,7  (0,4; 1,2) |
| C | 26% (145/546) | 32% (43/136) | 0,8  (0,5; 1,2) |
| D | 39% (214/546) | 32% (44/136) | 1,3  (0,9; 2) |
| Nº embriones transferidos | 1,78 ±0,4 (1; 2)  N=178 | 1,67±0,5(1; 2)  N=50 | 0,25  (-0,15; 0,6) |
| Tasa implantación | 31% (56/178) | 40% (20/50) | 0,7  (0,4; 1,3) |
| CONT. TABLA SUPL.4 |  |  |  |
| Tasa gestación por ciclo | 38% (46/120) | 51% (17/33) | 0,6  (0,3; 1,2) |
| Tasa gestación por transferencia | 46% (46/100) | 57% (17/30) | 0,6  (0,3; 1,4) |
| Tasa gestación múltiple | 17% (8/46) | 23% (4/17) | 0,7  (0,18; 2,6) |
| Tasa de abortos | 30% (14/46) | 18% (3/17) | 2  (0,5; 8,2) |
| Tasa nacido vivo por ciclo | 21% (25/120) | 36% (12/33) | 0,5  (0,2; 1) |
| Tasa nacido vivo por transferencia | 25% (25/100) | 40% (12/30) | 0,5  (0,2; 1,2) |

*****P<0,05
